# Supplementary material for: Quantification of methane emissions from hotspots and during COVID-19 using a global atmospheric inversion
Source: Copernicus journal article supplement (doi:10.5194/acp-2021-1056), 2022-01-04
Supplement: Supplementary file 1 [file acp-2021-1056-supplement.pdf]

## Supplement of

# Quantification of methane emissions from hotspots and during COVID-19 using a global atmospheric inversion

- 5 Joe McNorton<sup>1</sup>, Nicolas Bousserez<sup>1</sup>, Anna Agustí-Panareda<sup>1</sup>, Gianpaolo Balsamo<sup>1</sup>, Richard Engelen<sup>1</sup>, Vincent Huijnen<sup>2</sup>, Antje Inness<sup>1</sup>, Zak Kipling<sup>1</sup>, Mark Parrington<sup>1</sup>, Roberto Ribas<sup>1</sup>

<sup>1</sup>European Centre for Medium-Range Weather Forecasts, Reading, RG2 9AX, UK

<sup>2</sup>Royal Netherlands Meteorological Institute (KNMI), De Bilt, NL-3731, Netherlands

- 10 *Correspondence to:* Joe McNorton (joe.mcnorton@ecmwf.int)

The full list of simulations performed are provided in ST1 with the dates and purpose of the experiment, these can be divided between those used for prior error tuning and those used for source attribution for different times.

| Experiment Name | Start Date                   | End Date                       | Purpose                                     |
|-----------------|------------------------------|--------------------------------|---------------------------------------------|
| PR_10           | 1 <sup>st</sup> May 2019     | 1 <sup>st</sup> June 2019      | Evaluate 10% prior error                    |
| PR_20           | 1 <sup>st</sup> May 2019     | 1 <sup>st</sup> June 2019      | Evaluate 20% prior error                    |
| PR_40           | 1 <sup>st</sup> May 2019     | 1 <sup>st</sup> June 2019      | Evaluate 40% prior error                    |
| PR_80           | 1 <sup>st</sup> May 2019     | 1 <sup>st</sup> June 2019      | Evaluate 80% prior error                    |
| PR_MAP          | 1 <sup>st</sup> May 2019     | 1 <sup>st</sup> June 2019      | Evaluate mapped error                       |
| PR_MAP_0.5      | 1 <sup>st</sup> May 2019     | 1 <sup>st</sup> June 2019      | Evaluate halved mapped error                |
| Control_AN      | 1 <sup>st</sup> May 2019     | 1 <sup>st</sup> June 2019      | Control Analysis for Comparison             |
| INV_2018        | 1 <sup>st</sup> May 2018     | 1 <sup>st</sup> July 2018      | Emissions for 2018 (including case studies) |
| INV_2019        | 1 <sup>st</sup> January 2019 | 1 <sup>st</sup> July 2019      | Emissions for 2019 (including case studies) |
| INV_2020        | 1 <sup>st</sup> January 2020 | 1 <sup>st</sup> July 2020      | Emissions for 2020 (including case studies) |
| EAG_2019        | 1 <sup>st</sup> October 2019 | 1 <sup>st</sup> December 2019  | Eagle Ford blowout case study               |
| LATE_2020       | 1 <sup>st</sup> August 2020  | 31 <sup>st</sup> December 2020 | Various case studies.                       |

**Supplementary Table 1 Details of all IFS inversion experiments performed.**

The global coverage of TROPOMI XCH<sub>4</sub> is represented for a single day in S1, data have been gridded to the IFS increment resolution (~40km<sup>2</sup>) and averaged where multiple observations are available. The coverage is representative of the number of quality checked observations assimilated within one 24-window (~150,000). GOSAT and IASI observations are also assimilated further improving the global coverage.

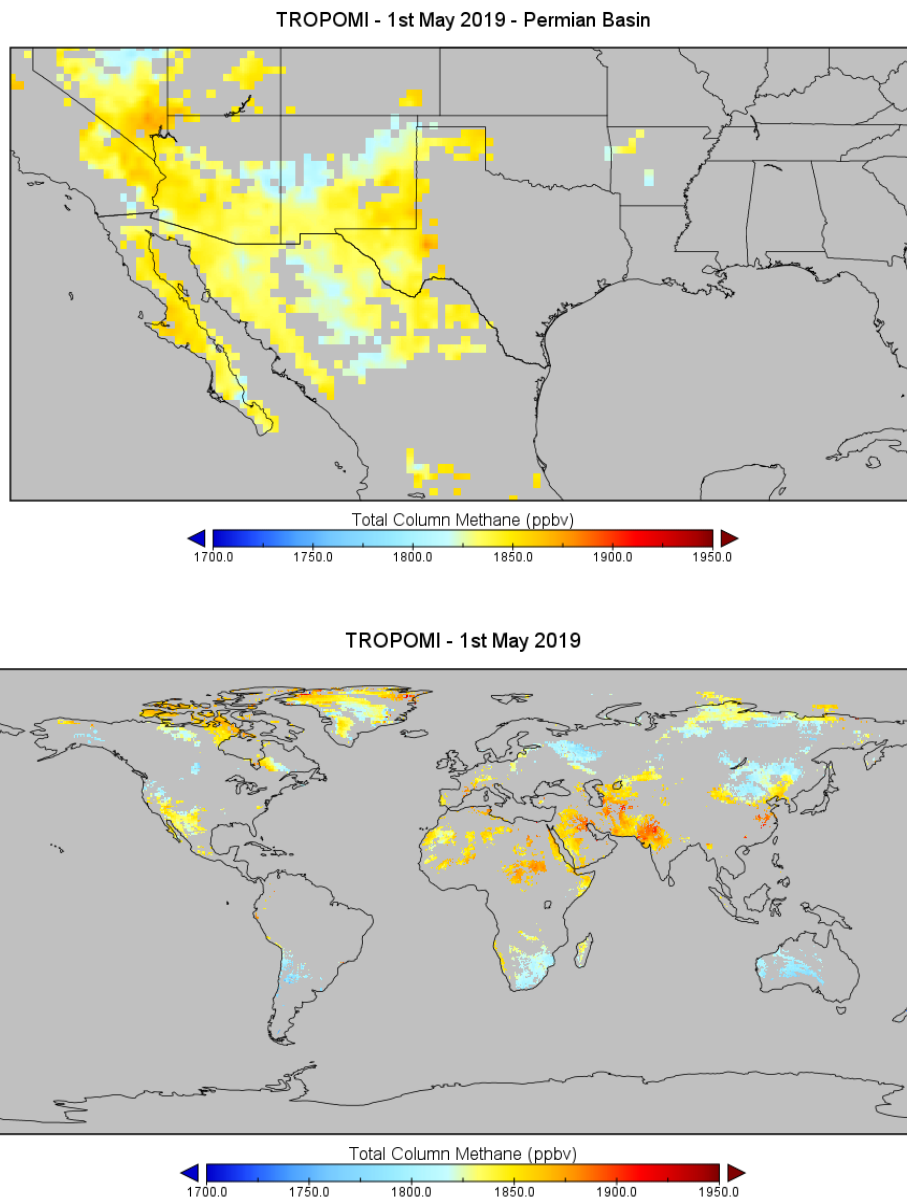

20 **Supplementary Figure 1. Example TROPOMI XCH<sub>4</sub> coverage for a 24-hour period on 1<sup>st</sup> May 2019. Quality flags are applied to remove poor data. Note that observations are averaged into 40 km<sup>2</sup> gridcells.**

Prior error evaluation was performed using multiple estimates as given by table S1 (PR\_\*). Comparisons were made for a 1-month period (May 2019) with TCCON retrievals (Wunch *et al.*, 2011) (S2). Only a subset of the 16 sites are shown for illustration purposes. Averaged across all sites the lowest standard error and absolute mean bias, and high correlation was found when using the mapped prior error (PR\_MAP).

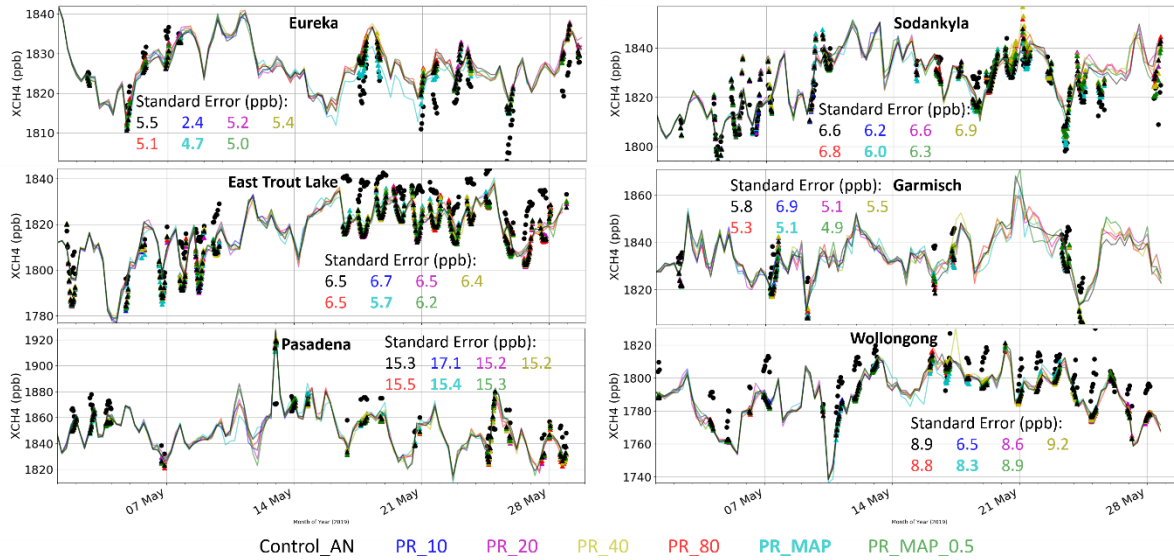

**Supplementary Figure 2. Comparisons of XCH<sub>4</sub> from inversions using 6 different prior uncertainties and 1 where only the initial 3d-state is optimised (Control\_AN) with a subset of 6/16 TCCON sites for May 2019 with standard error values given.**
